# Supplementary material
Source: PubMed Central journal article supplement (PMC4716815)
Supplement: ijmsv13p0008s1.pdf [file ijmsv13p0008s1.pdf]

**Table S1. PCR primers used for cloning and qPCR analyses**

| <b>Gene</b>           | <b>DNA sequence</b>                                                                | <b>Use</b> |
|-----------------------|------------------------------------------------------------------------------------|------------|
| <b>mouse BMP9 CDS</b> | AGGGGATCCACCACCATGGGCATGTCCCCTGGGGCCTTCCGGGTG<br>CGCGTCGACCTACCTACACCCACACTCAGCCAC | cloning    |
| <b>mouse BMP9</b>     | TCCTGCTGGTCTGTGTCACACAGCA<br>GAGGATGGAGATGGGACTCA                                  | qPCR       |
| <b>mouse GAPDH</b>    | ACCCAGAAGACTGTGGATGG<br>CACATTGGGGGTAGGAACAC                                       | qPCR       |
| <b>mouse Id1</b>      | ACGACATGAACGGCTGCT<br>CAGCTGCAGGTCCCTGAT                                           | qPCR       |
| <b>mouse Id2</b>      | CAGCATCCCCAGAACAA<br>TCTGGTGATGCAGGCTGA                                            | qPCR       |
| <b>mouse Id3</b>      | CTACGAGGCGGTGTGCTG<br>GCGCGAGTAGCAGTGGTT                                           | qPCR       |
| <b>mouse Smad6</b>    | ATCACCTCCTGCCCCTGT<br>CTGGGGTGGTGTCTCTGG                                           | qPCR       |
| <b>mouse Smad7</b>    | AAGATCGGCTGTGGCATC<br>CCAACAGCGTCTGGAGT                                            | qPCR       |
| <b>mouse CTGF</b>     | AAGGACCGCACAGCAGTT<br>AACAGGCGCTCCACTCTG                                           | qPCR       |
| <b>mouse CCN1</b>     | GGATGAATGGTGCCTTGC<br>GTCCACATCAGCCCCCTTG                                          | qPCR       |
